# Supplementary material for: Information Flow Analysis of Interactome Networks
Source: PLoS Comput Biol. 2009 Apr 10;5(4):e1000350. doi: 10.1371/journal.pcbi.1000350 (PMC2685719; doi:10.1371/journal.pcbi.1000350)
Supplement: Table S2 — Training examples in the semi-supervised analysis of genes expressed in C. elegans muscle cells. (0.02 MB XLS) [file pcbi.1000350.s005.xls]

## Sheet: PositiveNegativeTrainingSet.txt
ORF Name	Gene Name	Positive or Negative Training Example?
C18A11.7	dim-1	+
K12F2.1	myo-3	+
F08B6.4	unc-87	+
F54C1.7	pat-10	+
C36E6.5	mlc-2	+
F30H5.1	unc-45	+
F07A5.7	unc-15	+
ZK1058.2	pat-3	+
C29F9.7	pat-4	+
F15D3.1	dys-1	+
T01D1.2	etr-1	+
B0304.1	hlh-1	+
F01G12.5	let-2	+
C36E6.3	mlc-1	+
C47E8.7	unc-112	+
M03F4.2	act-4	+
F14D12.2	unc-97	+
F47G6.1	dyb-1	+
C09D1.1	unc-89	+
H14N18.1	unc-23	+
K11D9.2	sca-1	+
F11C3.3	unc-54	+
C44C10.8	hnd-1	+
C38C3.5	unc-60	+
ZC101.2	unc-52	+
F47A4.3		-
T11B7.4	alp-1	-
B0495.10	tag-178	-
ZC8.3	tag-226	-
C14B9.8		-
F21H7.5		-
C03C10.1	kin-19	-
F19H8.1	tps-2	-
Y52B11A.10		-
C47D12.7	kel-1	-
F44A2.5		-
B0507.1		-
K08H10.2		-
T04H1.4	rad-50	-
R11G1.4	sax-1	-
W02D9.1	pri-2	-
F25H5.2		-
Y47D3B.10	dpy-18	-
F23B2.5	flp-1	-
B0273.4	unc-5	-
D2005.5	drh-3	-
ZK507.6		-
B0564.10	unc-30	-
F12F3.1	exp-2	-
T04C9.4	mlp-1	-
F54E2.3	ketn-1	-
T05B4.3	phat-4	-
ZC302.1	mre-11	-
T23G5.5	dat-1	-
R06F6.9	ech-4	-
F23C8.6		-
T20F10.1	tag-181	-
C17E4.1		-
K04G2.8	2008-04-01	-
B0207.4	air-2	-
M03D4.4		-
T06E4.7		-
C01G10.11	unc-76	-
C30H6.2	tag-141	-
C09D4.1		-
C10G8.5	ncx-2	-
C07D8.6		-
T07G12.1	cal-4	-
T25E4.1		-
C45B11.1	pak-4	-
F58G4.1		-
C07A9.6	ugt-60	-
K06A1.3		-
M01A10.2	tom-1	-
ZK524.2	unc-13	-
C50F4.10		-
ZK1067.7	pqn-95	-
C24G6.8		-
B0273.1		-
C08B11.4	nrf-6	-
F08B12.4		-
T05G5.3	cdk-1	-
M88.6	pan-1	-
F36F2.5	tax-2	-
F18C12.3		-
F30F8.2		-
T18D3.4	myo-2	-
K08F8.2	atf-2	-
ZK673.7	tnc-2	-
R06C7.10	let-75	-
F56F3.4		-
F38G1.1	che-2	-
F10G8.8		-
Y113G7A.3	sec-23	-
Y54E5A.7		-
C33D12.6	tag-312	-
C33A12.15		-
R10F2.6		-
F09E8.3	msh-5	-
F43G9.6	fer-1	-
C49F5.2		-
ZK662.2		-
F29D11.2		-
T11F9.12		-
F36D4.3	hum-2	-
R12A1.4	ges-1	-
K07C11.2	air-1	-
R06A4.7	mes-2	-
H30A04.1	eat-20	-
K04D7.5	gon-4	-
T05B4.11	phat-5	-
T06E4.8		-
W06D12.3	fat-5	-
C46H11.9	phat-2	-
F46C8.6	dpy-7	-
F11E6.8		-
E01G6.1		-
F38A6.1	pha-4	-
Y37D8A.23	unc-25	-
T01G9.5	mei-1	-
T05E7.3		-
T10E9.4		-
T19B4.7	unc-40	-
F26C11.2	unc-4	-
T20G5.7	dod-6	-
ZK381.1	him-3	-
D2096.6		-
C33D3.1	elt-2	-
T14F9.4	peb-1	-
C32C4.3		-
R07B1.10	lec-8	-
W03C9.7	mex-1	-
W06F12.3		-
T10H9.4	snb-1	-
C35D10.2		-
C44H4.1		-
F58F12.2		-
F26F12.4		-
W05E10.3	ceh-32	-
Y53C12B.3	nos-3	-
F41H10.8	elo-6	-
ZK381.4	pgl-1	-
F54E2.2		-
F54C1.3	mes-3	-
C06A5.3		-
R08C7.8		-
F27D9.1	unc-18	-
W03G9.1	snf-1	-
T04C9.6	frm-2	-
T25C12.3		-
R02F11.1		-
Y102E9.1	odr-4	-
C54G7.3	lgx-1	-
C02H7.3	aex-3	-
D1046.1		-
C05B5.3	pqn-8	-
W01C9.3	pqn-73	-
F53H4.5		-
Y37E11B.1		-
F22A3.1	ets-4	-
F21H11.3	tbx-2	-
C06C3.1	mel-11	-
T03F1.11		-
C14C11.8	pqn-13	-
F58E10.2	end-1	-
C52E12.2	unc-104	-
K07C11.4		-
M05B5.2		-
K10D3.4		-
F29F11.5	ceh-22	-
T20G5.6	unc-47	-
ZK816.4		-
F07A11.2		-
C30A5.6		-
F49E10.2		-
F53B3.3		-
D1054.9		-
C27C12.6	dmd-4	-
F14B4.1		-
F02A9.6	glp-1	-
Y49E10.11	tat-1	-
R05F9.12		-
C14B9.2		-
C25B8.1	kqt-1	-
F48E3.8		-
R07B1.9		-
F08B12.1		-
T06D8.3		-
C25A11.4	ajm-1	-
T09A5.2	klp-3	-
