# Supplementary material for: Information Flow Analysis of Interactome Networks
Source: PLoS Comput Biol. 2009 Apr 10;5(4):e1000350. doi: 10.1371/journal.pcbi.1000350 (PMC2685719; doi:10.1371/journal.pcbi.1000350)
Supplement: Table S3 — A list of genes expressed in C. elegans muscle cells with their probability scores. (0.71 MB XLS) [file pcbi.1000350.s006.xls]

## Sheet: muscle_semisuper_res#CFB4AD.txt
ORF Name	Gene Name	Probability Score
K04H4.1	emb-9	0.992043
F40E10.3	csq-1	0.991458
Y9C2UA.1		0.987895
F42E11.4	tni-1	0.981596
Y5F2A.1		0.980693
D2092.4		0.978703
F22A3.7		0.972211
F02A9.2	far-1	0.971703
T21B6.3		0.966591
T03F7.1	snf-11	0.966457
F47A4.3		0.966388
M01D1.1	str-148	0.965529
T22D1.12		0.965153
T28B4.3		0.963124
F21H7.3		0.962323
F09B9.4		0.960623
C54E4.2		0.951648
F46E10.10		0.94861
C18A11.7	dim-1	0.948557
C34C12.5		0.946391
F13H10.5		0.946252
K12F2.1	myo-3	0.945402
F21D9.4		0.945033
D2063.1		0.941141
Y51A2D.14		0.940872
Y71G12B.11		0.938238
F36H1.4	lin-3	0.934596
ZK1248.16	lec-5	0.933579
ZC374.2		0.93204
C44B12.2	ost-1	0.927534
T11B7.4	alp-1	0.926676
T03G11.9		0.92555
T27A1.4		0.925506
C54F6.5		0.919932
T12A7.5		0.919854
R01H10.3	cor-1	0.917921
T22E5.5	mup-2	0.917189
F08B6.4	unc-87	0.916376
F53A3.1		0.915417
F53G2.4	pqn-42	0.91505
K10C3.3	zig-1	0.914686
R05D7.1		0.913937
B0228.4	tag-308	0.913437
T03E6.7	cpl-1	0.912649
C37C3.6	ppn-1	0.912142
ZK892.7	sdz-38	0.902197
W08A12.2		0.901675
Y105E8A.6	unc-95	0.899423
F10G2.1		0.898682
K05F1.5		0.89548
F54C1.7	pat-10	0.894277
C53D6.2	unc-129	0.891264
M03B6.5		0.890935
R13A5.4		0.88836
K02D7.2		0.885096
C44B7.10		0.883372
T10G3.1		0.882908
E03G2.3	mec-5	0.882878
F57B7.4	mig-17	0.882148
T22A3.2	hsp-12.1	0.880238
C36E6.5	mlc-2	0.878693
C40H1.5		0.874217
F55B12.5	nrf-5	0.873197
C05D11.4	let-756	0.872169
K01C8.10	cct-4	0.86812
D1007.14	pqn-24	0.867458
K10B4.6	cwn-1	0.866228
Y45F10B.13		0.862926
T05G5.1		0.862611
C29F5.1		0.8611
F54F2.1		0.860493
T05E7.4		0.858532
B0024.3		0.853248
W03G11.3		0.85303
R173.1	cah-5	0.851832
F47B10.8		0.849977
Y97E10AR.1		0.849001
C32E12.4		0.848353
R151.4		0.847594
Y37D8A.2		0.847566
F40F8.5		0.846612
F30A10.1		0.845553
F30H5.1	unc-45	0.84529
F56B6.4	uvt-5	0.844102
ZK688.6	tag-282	0.842752
T07H6.1		0.836085
M01E11.4	pqn-52	0.835923
C28C12.7	spp-10	0.833064
Y75B8A.5		0.830596
W06A7.2		0.828165
C47E12.8	dhp-2	0.82048
M03A8.4	gei-15	0.818007
Y39A3B.5		0.812338
C05E4.9	gei-7	0.810821
T25F10.6		0.810218
C18G1.1		0.80678
Y105E8B.1	lev-11	0.805914
C49A1.10		0.805888
F32A5.7	lsm-4	0.804088
F53F10.1		0.803525
T03G6.3		0.800124
Y105E8A.26	tag-301	0.799628
F54D7.4	zig-7	0.795894
F11F1.6		0.793777
Y73B6BL.21		0.793425
F40A3.6		0.792355
C01C7.1	ark-1	0.792282
F13H8.7		0.791989
F13D12.4	alh-8	0.789971
F42A10.3		0.789026
C03H5.5		0.78774
F26A3.4		0.786295
F22A3.2		0.781467
Y69A2AR.31		0.778133
F38B7.1		0.777858
H22K11.2		0.777804
F44B9.2		0.777539
K02B7.3		0.772681
B0403.6		0.771682
C02F12.7	tag-278	0.765645
B0563.2	tsp-11	0.762683
ZC123.4		0.760583
C44B7.4		0.759407
ZC477.9	deb-1	0.759329
F21C10.7		0.758094
F52H2.7		0.754755
Y23H5A.5	ctn-1	0.747339
C05E4.3	srp-1	0.746989
K07A12.6	hot-5	0.745619
C39D10.3		0.745576
Y5F2A.2		0.743674
T20B3.2	tni-3	0.743429
C33B4.4		0.742327
D1086.3		0.738475
Y43F8B.1		0.737973
Y58G8A.4		0.735704
F10E7.4	spon-1	0.73569
M01E11.7	tag-163	0.7351
F09G2.5		0.727744
Y55F3C.3		0.727629
T04C12.4	act-3	0.726426
E04F6.8		0.724326
D1044.1		0.723777
C35C5.5	lev-8	0.722743
T07C12.9		0.720915
C49H3.8		0.713111
ZK1058.1	mmcm-1	0.711921
F37H8.5		0.711878
C28H8.6	tag-327	0.701782
B0495.10	tag-178	0.701724
ZC412.3		0.698287
C14F5.3	tnt-3	0.697538
F07A5.7	unc-15	0.696997
B0285.7		0.693081
Y82E9BR.6		0.690554
ZC410.4	twk-8	0.690056
R06A10.4		0.68784
F22B7.5	dnj-10	0.68387
T21B10.1		0.683592
ZC8.3	tag-226	0.683493
T19D2.3		0.682579
F21D5.8		0.681634
F53H1.3		0.680734
K08F8.1		0.679023
Y105E8A.7	eat-18	0.678226
R31.2		0.67699
C27B7.7		0.676408
C15H9.9		0.67453
Y71H2B.4		0.6727
F40A3.4		0.672393
C07E3.9		0.665566
F52H3.7	lec-2	0.665553
Y50D7A.6	klp-20	0.660265
K07H8.12		0.659645
JC8.8		0.659138
F28H1.2	cpn-3	0.654336
Y39A1A.20		0.652085
ZK652.6		0.651432
Y47D3B.5	twk-31	0.648657
D2030.5	mce-1	0.648602
F48F5.6		0.646821
F27D9.8	stn-2	0.646648
T19H12.2		0.646614
Y57A10A.10		0.646298
F27D9.5	pcca-1	0.642079
C46G7.2		0.640987
C05C10.3		0.640388
M79.3		0.640361
R07G3.9		0.639924
C50F2.4		0.639787
C37F5.1	lin-1	0.639003
F54D7.2		0.638811
K08C7.3	epi-1	0.638018
C18E9.1	cal-2	0.637487
K07E12.1	dig-1	0.635415
C46F4.2	acs-17	0.634272
W08E3.3	tag-210	0.63332
R11A5.7		0.632278
Y39A1C.1		0.630282
Y38F1A.9	oig-2	0.629916
C14B9.8		0.628455
H22K11.4		0.628169
Y42G9A.4		0.626594
F54F3.1	nid-1	0.625735
ZK1058.2	pat-3	0.62555
F43G9.3		0.62549
F09F7.2	mlc-3	0.624546
K11C4.5	unc-68	0.623769
C45B2.2		0.623158
K10B3.7	gpd-3	0.62225
F29G9.2		0.620486
ZK563.4	clc-3	0.618249
T03G11.1	pqn-62	0.617132
D1009.3		0.61232
Y73F8A.26		0.605674
F41C3.5		0.604215
Y52B11A.4		0.602972
C07G2.3	cct-5	0.601475
ZK1321.2		0.599985
K01A2.8	mps-2	0.598766
K06C4.9		0.597911
F22E12.1		0.595136
C48B6.9		0.595103
Y71F9AR.2		0.59189
Y37E3.11		0.591285
R04D3.4		0.590997
R11G1.6		0.590005
C29F9.7	pat-4	0.589393
F40F4.4	lbp-3	0.588883
Y46D2A.1		0.588599
T23B12.11		0.586998
Y56A3A.29	ung-1	0.586682
ZK1073.2		0.586533
F42H10.3		0.585671
Y62E10A.13		0.585052
H35N03.1	exp-1	0.583731
T28B4.1		0.583403
T01G1.3		0.579442
F28B3.10		0.578731
Y17D7B.4		0.577267
R07G3.8		0.575252
C52D10.6	skr-12	0.574486
C52B9.6	twk-28	0.574176
T04F8.2		0.573052
K07D4.7	tag-218	0.57061
ZK643.1		0.570059
R02F2.2		0.567833
F59A2.3		0.566961
Y105E8B.4	bath-40	0.566302
F35H12.5		0.565357
F19C7.3		0.564761
R06C1.1	hda-3	0.563349
ZK121.2		0.562312
F15G9.4	him-4	0.561764
F53A9.10	tnt-2	0.560904
R11H6.5		0.559518
Y57G11C.36		0.557875
T19C3.4		0.556182
C25A1.13		0.555048
Y37E11B.5		0.55317
Y71F9B.16	dnj-30	0.55223
F08D12.7		0.552009
F56D12.5	vig-1	0.551176
Y116F11B.12	gly-4	0.550886
R11A5.4		0.550742
K08C7.7		0.547608
F27C1.2		0.547234
T14G12.4	fkh-2	0.546335
F15D3.1	dys-1	0.544816
T04C12.5	act-2	0.54454
T09B4.5		0.543851
F57C9.4		0.543306
K07E8.6		0.543295
W04A8.4		0.543073
B0496.3		0.541604
K09C8.5	pxn-2	0.541191
T02G5.9	krs-1	0.541114
Y73B6BL.3		0.540358
ZK593.1		0.540295
W06F12.1	lit-1	0.538702
C08D8.2	tmd-2	0.535452
T22A3.4	tag-237	0.534347
T22B2.4	sup-12	0.532476
T06A10.4		0.530522
F32A6.5	sto-2	0.530377
T02D1.8		0.529136
R07H5.2	cpt-2	0.52905
K10D3.2	unc-14	0.526023
F17H10.3		0.525928
R10E4.2	tag-310	0.525654
W02C12.3	hlh-30	0.521141
F15D3.7		0.517222
C07F11.1	tol-1	0.516568
R09G11.1	sup-10	0.515813
T07E3.4		0.515676
ZK669.1	tag-341	0.5123
H18N23.2		0.510541
C03G5.1	sdha-1	0.508591
F10G7.9		0.508238
F31D5.3	tag-149	0.508206
F21H7.5		0.508186
F54F7.1	taf-7.1	0.507901
C26E6.3		0.507678
T23F1.7	dpf-1	0.503823
F11G11.1	gst-8	0.503797
T24B8.4		0.503402
W04E12.8	clec-50	0.503012
R07E3.5	acl-5	0.502721
C46C2.7		0.500583
W09G3.6		0.50006
C34E11.3	tag-241	0.499726
B0336.11		0.499522
C18E3.1		0.498903
K08H10.1	lea-1	0.497242
Y73B6BL.24		0.492558
Y38F1A.6		0.490368
T03G11.8	zig-6	0.490104
T25B9.3		0.489887
F57H12.2	unc-24	0.489657
T01D1.2	etr-1	0.489172
C35E7.1		0.488854
F53F4.11		0.488762
D1086.12		0.487544
F41G4.3	sto-5	0.485389
T24C4.2		0.485341
Y39A3CL.6	pvf-1	0.484455
Y54G9A.7		0.484425
Y66H1B.2		0.483775
M04B2.6		0.480208
Y46G5A.35		0.479768
K03C7.1		0.478758
C26D10.4		0.478511
D1086.8		0.47654
F49E2.1		0.476062
C37E2.1		0.475548
Y77E11A.1		0.474545
CC4.3	smu-1	0.474129
C35E7.11		0.472564
C30A5.2	rfs-1	0.472452
T23B12.8		0.471947
T23B5.4		0.4702
C48G7.3	tag-333	0.470164
C53B7.4	asg-2	0.469482
F59F3.6		0.46924
K05F1.6		0.468507
C18H9.2		0.467632
E02H4.1	del-1	0.466973
D2024.7		0.465642
R53.3	egl-43	0.464448
F54A3.3		0.464431
W06H8.8	ttn-1	0.464137
Y113G7A.11	ssu-1	0.463858
C01G6.1	aqp-2	0.463608
W09G3.1		0.462907
H14N18.3		0.462511
F54G8.4	nhl-1	0.46245
Y116A8C.43		0.462122
R06B10.5		0.461786
Y95B8A.10	pde-6	0.459733
Y105C5B.28	gln-3	0.458466
F58D5.1	hrp-2	0.457663
C47B2.9		0.456285
R13A5.8	rpl-9	0.456202
R11B5.1	tag-236	0.455671
Y51A2D.10		0.455448
T26A5.9	dlc-1	0.454907
F32A11.1		0.452866
C04F12.3	ikb-1	0.452591
F46C8.3		0.451885
Y97E10AL.3		0.450078
C47B2.7		0.449972
Y47D3A.6	tra-1	0.449349
T20D3.5		0.449133
F47A4.2	dpy-22	0.44793
K08C7.6		0.447486
F11C7.5		0.446549
T13C2.3		0.445147
R03E9.2		0.445002
R07B7.11	gana-1	0.444575
C33H5.12	rsp-6	0.444266
K09A9.3	ent-2	0.442432
C30F12.7		0.442112
Y67D8C.10	mca-3	0.441763
C34F11.9	dsh-1	0.441682
Y34B4A.7		0.441049
DH11.2		0.440984
R04B5.5		0.440873
ZK616.1		0.440406
C41C4.5	unc-105	0.439134
Y40H7A.4		0.436491
F59H6.9	bath-1	0.435199
W02B8.1		0.434045
B0414.8		0.433192
B0304.1	hlh-1	0.432545
F13D11.2	hbl-1	0.432429
T24H10.1		0.43235
C54G10.3	pmp-3	0.432222
Y44A6E.1		0.432056
F41H10.10	htp-1	0.431659
F25B4.1		0.431643
F53C11.4		0.43146
Y42G9A.1		0.431107
C31E10.6		0.430542
Y48B6A.3	xrn-2	0.430014
T12A7.6		0.429908
F41E6.6	tag-196	0.429798
F20C5.5		0.42861
C06E8.3	prk-1	0.427747
C03C10.1	kin-19	0.42748
F43G9.1		0.4266
K08F4.2		0.426406
F33C8.3	tsp-8	0.426396
Y60A3A.21		0.426078
C55B6.2	dnj-7	0.425768
C26G2.1	syg-2	0.425379
Y71G12B.26		0.425141
Y39A3CL.7		0.424919
T20F7.6		0.423941
F57F10.1	abts-3	0.423935
Y39G10AR.12	tpxl-1	0.423643
F23D12.7		0.423531
F57B10.3		0.423481
F22B8.6		0.423321
Y69A2AR.7		0.423195
F47B10.1		0.419422
R05F9.10	sgt-1	0.419107
T01E8.6		0.418305
C37H5.8	hsp-6	0.418084
H23L24.1		0.416323
F35G12.11		0.416155
C24A3.6	twk-18	0.414647
F33H2.3		0.413807
C09B8.7	pak-1	0.412595
B0238.10		0.412058
C09H6.2	lin-10	0.410984
F31F6.4	flp-8	0.409957
Y48B6A.14	hmg-1.1	0.409035
Y71H2AM.15		0.408817
F18G5.6		0.408565
C40C9.5	nlg-1	0.408363
C17E4.9		0.407903
T21D12.4	pat-6	0.405768
F02H6.5		0.405733
T21H8.1		0.404739
Y54G2A.43		0.404066
Y44A6C.1		0.403951
F12F6.1		0.402996
C55A6.1		0.402174
K07C11.5	tag-225	0.401369
Y43C5A.5	thk-1	0.399641
F52H2.2	aat-3	0.398783
F40G9.4	hlh-21	0.398611
Y75B8A.22	tim-1	0.397688
F13E6.4		0.397145
F10G7.11		0.396859
M7.8		0.396177
Y48B6A.13		0.39615
ZK909.5	fbxb-70	0.3959
C16C8.11		0.395579
T20H4.5		0.395513
F29B9.8		0.395151
T14G12.3	tag-18	0.395015
F40E10.4	slt-1	0.394712
T23D5.6	str-18	0.394512
Y69H2.1		0.393546
F54D5.8	dnj-13	0.392013
F10C5.2		0.39155
F11C1.5		0.390945
Y53G8AR.6		0.390439
JC8.4		0.389815
K10D11.1	dod-17	0.388264
T16A9.5		0.387657
W09B12.1	ace-1	0.387449
F25H2.11	tct-1	0.387249
F44F4.2		0.38708
C08F1.8		0.386146
T23D8.4	eif-3.C	0.386083
F40F4.5	tba-9	0.385931
D2063.2		0.384386
F57B10.11	bag-1	0.384079
Y110A7A.6		0.382702
K09A9.5	gas-1	0.382609
T04A8.4	tag-243	0.382437
Y92C3B.3	rab-18	0.382279
T13H5.7	rnh-2	0.381928
VW06B3R.1	ucr-2.1	0.381537
Y60A3A.13	frs-3	0.379297
F28F8.7		0.378707
ZK809.8		0.3778
C25H3.3		0.375875
C05D9.7		0.375402
F07C4.11		0.375227
F25E2.3		0.374465
Y92H12BL.1		0.373903
C14B1.4	tag-125	0.373711
T10E9.7	nuo-2	0.373089
Y11D7A.14		0.373023
F19H8.1	tps-2	0.372906
T05C12.6	mig-5	0.372136
F44E2.6		0.371837
Y57G11C.4		0.371008
F07A11.1		0.369022
M05D6.5		0.367771
T19B10.7	ima-1	0.367578
F08C6.7	unc-98	0.366636
B0001.5		0.366142
C35A5.7		0.365661
F14E5.4		0.36541
ZK822.1		0.365348
F21C3.3	tag-202	0.365233
F21H11.2	sax-2	0.364663
F40H3.5	hst-3.1	0.364216
Y71G12B.9		0.363643
Y87G2A.8	gpi-1	0.363312
C14C10.3	ril-2	0.363082
Y41D4B.4		0.36253
C46G7.4	pqn-22	0.362329
F44G4.4	tag-169	0.361967
M02D8.1		0.361289
R07E5.2	prdx-3	0.360633
T19B4.3		0.360321
K01G5.1	tag-331	0.36021
F19F10.4		0.359766
F36H1.3		0.35879
Y6D1A.1		0.358481
Y41C4A.13		0.358351
C44B11.3	mec-12	0.357523
F54D12.4		0.357424
Y76B12C.7		0.357339
ZK430.7		0.357331
Y116A8B.1		0.357302
W05F2.4		0.357243
F46C5.6		0.355876
C54E4.3	gcy-37	0.355766
C06G1.5		0.354907
F46G11.1		0.354572
T10C6.5		0.354025
2RSSE.1		0.3534
Y67D8C.3		0.353279
Y45G12B.2		0.352786
Y22D7AR.6		0.352567
F42A8.2	sdhb-1	0.35246
ZK742.3		0.352397
C27F2.5		0.351969
T04A8.9	dnj-18	0.351928
T05B11.1		0.351769
F40H6.6		0.35155
C47E8.4		0.350965
ZK675.4		0.350955
C16A3.9	rps-13	0.350568
F40F11.1	rps-11	0.350204
D2007.1		0.349444
Y71H9A.3	sto-4	0.349291
Y51A2D.20		0.349237
F21F3.5	unc-38	0.348937
C07D10.1		0.34875
C46C11.3		0.346918
Y110A2AR.1		0.346582
B0303.15		0.346375
Y45G5AM.2		0.345801
Y56A3A.17	npp-16	0.345225
C26E6.11	mmab-1	0.345193
R07B7.9		0.345176
E01G6.2		0.344951
LLC1.3		0.344032
M01A8.1		0.343337
F56D1.6	cex-1	0.343251
F22D6.2		0.342867
ZK637.13		0.341946
F01F1.11		0.341322
T10B5.5		0.340436
C33D9.3		0.340239
F08F3.10		0.340016
F09E10.8	toca-1	0.339961
C13B4.2	usp-14	0.339753
Y113G7B.18	mdt-17	0.339308
Y71G12B.20	mab-20	0.338986
R13G10.4		0.338617
F57B10.7	tre-1	0.338419
C37A2.5	pqn-21	0.338318
Y45G5AM.6		0.338101
Y52B11A.10		0.33799
C47D12.7	kel-1	0.337158
Y56A3A.30		0.336974
Y113G7A.4	ncx-1	0.335217
W01C8.4		0.333855
B0350.2	unc-44	0.333568
C27B7.6		0.333294
T12E12.6		0.333294
ZC404.8	spn-4	0.332829
F01G12.5	let-2	0.332734
C27A2.8		0.332579
R09G11.2	nhr-1	0.332117
Y49E10.3	pph-4.2	0.331896
C36E6.3	mlc-1	0.331093
Y52D3.1		0.33108
F56D12.1	alh-6	0.330995
C01B7.6	rpm-1	0.330783
W02G9.2	kel-8	0.330561
H06I04.4	ubl-1	0.33043
F56H1.6		0.329706
C24A11.2		0.329647
C02D5.2		0.329623
B0432.9		0.329506
Y53H1C.1	aat-9	0.329179
F52E4.1	pccb-1	0.328754
T28D9.2	rsp-5	0.328546
T12E12.1		0.328478
B0213.15	cyp-34A9	0.32671
T27A3.1		0.326668
ZC53.1		0.325892
C15B12.6		0.325687
C50F7.6		0.325141
T26H2.3	fbxb-2	0.324367
C35A11.1		0.323967
Y24F12A.2		0.323759
K07C5.4		0.323089
H21P03.3	sms-1	0.322755
K07A3.1	fbp-1	0.322537
F42C5.8	rps-8	0.321853
C33A11.2		0.321351
Y69F12A.2	alh-12	0.320342
C50F2.1		0.320076
Y95B8A.6		0.320076
ZK697.6	gst-21	0.318841
ZK1010.9	snf-7	0.318809
K06A4.3		0.318084
F59A3.9		0.317241
Y41D4B.26	nhr-146	0.317143
C47E8.7	unc-112	0.316914
C16C10.10	tag-73	0.316481
D2089.5	gbh-1	0.316432
H32K16.1		0.316137
D2023.2	pyc-1	0.315805
Y54E5B.1	smp-1	0.315179
ZK593.6	lgg-2	0.314614
F35B3.5	pqn-34	0.314525
C18A3.3		0.313955
F36A2.7		0.313815
D1081.8		0.313616
Y77E11A.7		0.313531
R102.5		0.313256
Y43F11A.2		0.311628
F07A11.3	npp-5	0.311319
ZK265.5	sre-23	0.310885
F52B11.2		0.310265
Y51H1A.3		0.310188
F58E10.3		0.309481
F58H7.1		0.309119
ZK520.5	cyn-2	0.308333
F44A2.5		0.308187
F31E3.1	ceh-20	0.307684
Y47D3B.7	sbp-1	0.307378
C04F5.8		0.307122
ZK177.4		0.30662
C04E7.2		0.306043
E01A2.6		0.305893
K09F5.6		0.305889
F49C12.14		0.305859
Y102E9.5		0.305825
B0001.7		0.3056
Y20F4.2		0.305562
Y82E9BR.3		0.305543
C02F12.1	tsp-17	0.305325
C47E8.8		0.304767
Y51A2D.9		0.304722
Y71F9B.5	lin-17	0.30463
M03A1.1	vab-1	0.304456
C44C1.3	ncs-1	0.304162
F46G10.7	sir-2.2	0.303839
F48G7.11	nhr-190	0.303727
W02A11.2		0.303707
F52A8.3		0.303524
VF13D12L.1		0.303456
T21B4.4		0.303407
Y34D9B.1	mig-1	0.302883
C34H3.1	tag-275	0.302599
K02F2.6	ser-3	0.302313
Y57A10A.15		0.301931
H17B01.1		0.301626
Y113G7B.16		0.301527
T05A10.1	sma-9	0.300708
ZK632.10		0.300526
Y41D4B.13	ced-2	0.300482
K10D2.2		0.300338
Y73F8A.24		0.300165
Y54E10A.14	rom-5	0.299723
F52A8.4		0.299694
T06C12.14		0.299329
C44B9.4	athp-1	0.298975
F44D12.4		0.298582
R07G3.7		0.298339
ZC504.3		0.29812
F27C1.8	dpy-5	0.297663
ZK265.8		0.296445
F25G6.4	acr-15	0.296006
T12A2.16	hot-4	0.295846
ZK682.5		0.29557
M03F4.2	act-4	0.295475
R01H10.1	div-1	0.295186
T05A7.11		0.294854
Y37E3.5		0.294153
W05G11.6		0.293845
F59A2.4		0.29365
C39E9.11		0.293314
F11A10.5		0.293251
K03E6.5	unc-1	0.292956
Y45G5AL.1		0.292925
C24H12.4		0.292895
H37N21.1		0.291783
Y47G6A.24	mis-12	0.291469
H01G02.3		0.291378
Y39G8C.1	xrn-1	0.290506
Y48E1B.5		0.289825
K08E3.8	mdt-29	0.289605
K07F5.8		0.289345
Y104H12D.3		0.289333
F56B3.2		0.289271
C32E8.9		0.289095
C16C10.11		0.288909
Y39E4B.5		0.288541
Y59A8B.21		0.288398
Y39B6A.33		0.288317
F52C9.5		0.288256
ZK1240.3		0.288097
F22B7.10	dpy-19	0.287885
Y87G2A.1		0.287647
T14D7.1		0.287304
C25E10.1	nhr-30	0.287164
C49H3.10	imb-6	0.287005
F57G12.1		0.286661
T08G2.3		0.286641
K11D12.2	pqn-51	0.286551
C53D5.6	imb-3	0.286355
ZK354.3		0.285773
Y39B6A.17	nhr-95	0.285712
C37E2.5	ceh-37	0.285459
F56A3.5	bro-1	0.283074
T01G1.2		0.282287
C45B2.4	ggr-2	0.281861
B0507.1		0.281728
F35G2.4	phy-2	0.2817
C18D1.4	stg-1	0.281492
ZK75.2	ins-2	0.281482
C37C3.12		0.281146
F56F3.5	rps-1	0.2809
Y67A10A.6	ssu-2	0.280807
R12C12.9		0.280784
K04H4.6	crn-6	0.280327
F35D11.4		0.280185
Y48E1B.3		0.280156
C29F3.1	ech-1	0.279936
W03F9.4		0.279462
F20D6.10		0.279395
F13D12.10		0.278961
M01D1.2	math-34	0.278943
T01G9.6	kin-10	0.278786
Y39G10AR.14	mcm-4	0.278776
ZK1053.3		0.27867
F59B2.9		0.278221
Y53F4B.22		0.277269
C18F3.4		0.276643
K02E10.8	syg-1	0.276295
T19D7.6		0.276201
T01C3.2		0.275802
F08G5.3		0.275092
Y38H6C.10		0.274872
C24A3.2		0.274774
W03G1.6	pig-1	0.27424
C27C12.2		0.273709
Y40D12A.1		0.273205
Y69A2AR.2	ric-8	0.273078
B0019.2		0.272522
Y55F3BR.4		0.272185
W03H9.4		0.272056
F38E11.1	hsp-12.3	0.272039
Y17G7B.7	tpi-1	0.271944
F01G4.5		0.271913
Y73C8B.5		0.271717
W02A2.2	far-6	0.270933
F27D9.7		0.270544
Y37E3.9	phb-1	0.270539
M02E1.1		0.270515
T06E6.2	cyb-3	0.270393
F42G8.12	isp-1	0.270185
C34E10.8		0.27017
K08H10.2		0.27016
Y65B4BR.4	wwp-1	0.270005
C49H3.11	rps-2	0.269963
M01G5.3		0.269927
C31C9.1	tag-10	0.269746
T13B5.8		0.269618
T18D3.5		0.269485
R05C11.1		0.268631
C23G10.3	rps-3	0.268515
F31A9.2		0.268395
K07B1.2	coq-6	0.267954
W05H7.1		0.267761
F56F10.2		0.267474
T04H1.4	rad-50	0.267153
T23H2.3		0.267018
C26E6.2		0.266969
F53G2.7	mnat-1	0.266961
R07E4.6	kin-2	0.266749
Y48G1A.1		0.266376
F44G4.1		0.265794
Y37E3.10		0.265775
F19F10.5		0.265705
Y80D3A.2	emb-4	0.26556
R04B5.6		0.265537
K07B1.8		0.264959
Y39G10AR.10		0.264675
ZK455.4	asm-2	0.264603
Y57G11C.47		0.264322
C33D9.6		0.263954
C25H3.9		0.263895
Y43F8C.3		0.263808
M02B7.3	osm-3	0.263256
C05H8.1	ckk-1	0.263148
Y48B6A.2	rpl-43	0.26306
Y53C10A.12	hsf-1	0.26265
R90.1		0.262643
F15A2.3	srd-51	0.26227
H17B01.4		0.262259
F37C12.13		0.261645
F57C2.2		0.261624
K09G1.1		0.261377
M05D6.6		0.261094
C06B3.8	gcy-32	0.260965
R11G1.4	sax-1	0.260419
C52B9.3		0.260225
BE0003N10.2		0.260175
Y39B6A.37		0.259916
F52H3.1	let-268	0.259401
M60.4		0.259146
ZK525.2	aqp-11	0.258862
B0513.4		0.258772
R144.12		0.258566
M01F1.3		0.258365
W07G4.5		0.258287
D2045.2		0.257462
Y39A1A.1		0.256014
T25G12.5		0.255992
W06B11.2	puf-9	0.255772
Y116A8C.27		0.254982
T04F8.9		0.254208
C45B2.5	gln-1	0.253972
C17E7.4		0.253818
T05C1.4		0.253684
Y69E1A.6	sri-19	0.253201
Y48G8AL.9		0.252722
ZK418.9		0.252654
F32H5.7	twk-43	0.252385
F25H5.4	eft-2	0.252339
F37B4.7		0.252337
Y54F10AL.2	est-1	0.25221
K08E3.4		0.252149
K08A2.5	nhr-88	0.252036
F01G4.2	ard-1	0.251982
T08G11.5	unc-29	0.251788
Y40B1B.8		0.251504
C18D4.6		0.251441
F54E7.9		0.251053
T05B4.9		0.250767
T26E3.2	ndx-1	0.250558
F14B6.3		0.250506
F59E12.9		0.250326
C40A11.4		0.250283
B0207.12	avr-14	0.250116
W02D9.1	pri-2	0.24997
C44F1.5	acy-3	0.249896
C07A12.4	pdi-2	0.249696
Y61A9LA.8		0.249584
W01A11.3	unc-83	0.249328
Y45F3A.3		0.248989
T27A1.6	mab-9	0.248496
Y57G11C.9		0.248291
M142.4	vab-7	0.2477
Y66A7A.1		0.247418
B0035.4	pfd-4	0.247025
F13B9.5	ksr-1	0.247011
F38E1.7	mom-2	0.246736
C08F1.11		0.246685
Y75B12B.4	bath-36	0.246494
C01G8.3	dhs-1	0.246409
C32B5.6		0.24611
Y73F8A.6	ccg-1	0.245885
H14A12.2	fum-1	0.245797
F54D10.1	skr-15	0.245672
M01B12.4		0.245531
T07H6.4		0.244887
C36E8.2		0.2444
K08A2.1		0.243898
C08F1.5	math-4	0.243888
Y62E10A.19		0.243726
W08D2.5		0.243647
Y46B2A.1		0.243203
K09A9.6		0.243104
T10B10.4		0.242081
R01B10.6		0.241621
R31.3	osm-6	0.241451
C33D9.1	exc-5	0.241178
C39B5.2		0.241042
R151.2		0.240942
Y71F9AL.6		0.240547
F33H1.1	daf-19	0.240503
Y95B8A.1	nas-30	0.240137
T07D3.7	alg-2	0.23983
W08A12.3		0.239648
F42E11.3		0.237995
F46C8.2	col-174	0.237282
K01A2.7	col-69	0.237089
C18B12.4		0.237003
T05B9.1		0.236995
C39E9.3	col-131	0.236843
Y17D7A.3	nhr-65	0.236133
F38A6.3	hif-1	0.235613
C33H5.8		0.235128
B0041.2		0.235036
F32D8.13		0.234994
F25H5.2		0.234692
C44B7.7		0.234064
Y48A5A.1		0.23401
Y37D8A.9	mrg-1	0.23384
Y41E3.10		0.233791
F59E10.2	cyn-4	0.233719
T05D4.1		0.233254
Y23H5A.1	crs-2	0.233115
F08F8.10		0.23281
ZK180.4		0.23278
C27A2.2	rpl-22	0.232313
R57.1		0.231944
Y34D9A.1		0.231861
T19E7.6		0.231741
Y73B6BL.19		0.231732
C30D11.1	unc-103	0.23151
F42G10.2	mkk-4	0.231413
T13F2.2		0.231329
F43G6.4		0.231191
B0261.8		0.231125
F55D10.1		0.230988
C25E10.8		0.230606
M28.1		0.230312
F18H3.3	pab-2	0.230308
Y73B6BL.29		0.230164
F11A10.1	lex-1	0.230149
T27D1.1	cyn-9	0.22982
W06H3.2	pus-1	0.229816
F38E1.8	srsx-22	0.229591
ZK1058.9		0.22952
Y7A9D.1		0.229346
Y54E10A.7		0.229171
Y53G8AR.2		0.22905
ZK809.7	prx-2	0.228959
F17E5.1	lin-2	0.228822
Y47D3B.10	dpy-18	0.22855
R05H5.3		0.22847
Y48G1C.8		0.228391
C07H6.7	lin-39	0.228376
C41C4.2	sre-2	0.227972
M03F4.7		0.227893
K11D12.7		0.227823
W09C5.6	rpl-31	0.227756
T04C4.1		0.227489
F35D2.3		0.227177
ZK563.6		0.227164
W10C6.1	mat-2	0.226658
C50B6.3		0.226619
F07A11.4		0.226585
E04A4.6		0.226583
F25H8.5	dur-1	0.226411
Y43F4B.4	npp-18	0.226222
C34E10.1	gop-3	0.226193
R09A1.5		0.226193
F31D4.9		0.22597
F29A7.2	fbxb-107	0.225963
F25H5.3		0.225657
F22F4.3	klp-13	0.225442
F14H3.6		0.225393
K03B4.2		0.225234
B0523.5	fli-1	0.225115
F01G10.7		0.224217
F36A2.13		0.223648
K04D7.3	gta-1	0.223272
ZK783.1	fbn-1	0.22296
Y53G8AR.5		0.222848
B0361.6		0.222663
R05D8.11		0.222567
B0513.3	rpl-29	0.222414
D2023.5		0.222374
F20B10.1	nlr-1	0.222263
C02C6.3		0.222167
Y53H1A.1		0.221416
F23H11.4		0.22102
ZK1307.6	fzr-1	0.220892
ZK154.4		0.220223
M01D1.10	fbxb-45	0.220151
F21H7.1	gst-22	0.219958
T28H11.4	pes-1	0.219895
T13H5.1		0.219121
F46B6.7	ztf-7	0.218729
Y105E8A.17	ekl-4	0.218663
Y51A2D.4		0.217846
C54G6.2		0.217794
F33A8.3	cey-1	0.217719
T02C12.2		0.217583
F39B3.2		0.21729
T06D10.1		0.217099
F54D5.2		0.217063
T27F6.5	prs-2	0.217059
Y57G11C.40		0.216541
F33H2.7		0.216078
C41C4.6	ulp-4	0.21593
F56A11.1	gex-2	0.215386
C46C2.2		0.214853
F55A4.2		0.21456
F37C12.4	rpl-36	0.214543
B0393.1	rps-0	0.214531
T14G11.3		0.214196
C49F5.3		0.213992
C17G1.3	ugt-23	0.21395
R08A2.5		0.213908
F41G4.2	cas-1	0.213746
R13A5.11		0.213409
F28C6.7	rpl-26	0.213373
C47G2.2	unc-130	0.21337
F45E4.4	tag-199	0.213345
F29G9.4	fos-1	0.213243
F46F11.6		0.212972
Y55F3AM.3		0.212971
T08B2.8		0.212719
T09A5.8		0.212498
F08C6.6		0.212242
F22G12.6		0.21223
F35C8.3	jkk-1	0.212108
D2030.2		0.211982
F38E9.5		0.211324
Y51A2D.19	slo-1	0.21103
R144.5		0.210948
ZC449.5		0.210878
K11D12.10	mlk-1	0.210817
F23B2.5	flp-1	0.210591
Y17G9B.7	fbxb-77	0.210589
C10E2.3	hda-4	0.210494
D2092.3	acr-11	0.210485
F26A1.13		0.209992
F34D10.4		0.209795
F10A3.3	fbxa-18	0.209649
F26H11.4		0.209632
B0273.4	unc-5	0.209475
C27D6.12		0.209468
T25B9.12		0.209427
T06C12.6	nhr-102	0.20942
T16G12.4		0.20904
T27C4.4	egr-1	0.208611
C13C12.1	cal-1	0.208444
Y54E2A.4		0.208274
ZK154.3	mec-7	0.208017
C17B7.2		0.208012
F52B5.6	rpl-25.2	0.207754
B0303.11		0.207668
R05F9.6		0.207664
ZC204.2		0.207479
T09B9.1		0.20723
H28O16.1		0.207134
C31H5.7		0.207029
T22H6.7	abf-6	0.206815
ZK892.1	lec-3	0.206761
Y32F6A.3	pap-1	0.20674
C35D10.6		0.206398
F14D12.2	unc-97	0.206376
K07A1.8	ile-1	0.206338
C29E6.4		0.205901
C39E9.13	rfc-3	0.205797
K09C8.7		0.205714
C09D4.5	rpl-19	0.205439
F39B2.5		0.205305
B0432.5	cat-2	0.205279
F23H11.8	pef-1	0.205154
T12D8.9		0.205125
Y39A1B.3	dpy-28	0.204978
F52G3.1		0.204961
Y110A2AR.3		0.204536
C41H7.6		0.204466
W03C9.3	rab-7	0.204296
T20G5.13		0.204146
T28F12.3	sos-1	0.203813
T26G10.1		0.203739
F55A8.1	egl-18	0.203432
W04H10.3	nhl-3	0.203181
F32D1.5		0.202643
Y48G8AL.14	aps-3	0.202516
W01B11.3		0.202474
F13E6.6	rhgf-1	0.202423
T06D8.6	cchl-1	0.201971
C46C11.2		0.201945
C05G5.4		0.201624
F31E3.5	eft-3	0.201465
Y113G7B.23	psa-1	0.201341
W07E6.1		0.201151
T09B4.2		0.20071
T27E4.9	hsp-16.49	0.200531
F31F7.2		0.199736
C09E9.1		0.199607
ZC168.5	grl-21	0.199502
M01B2.10		0.199496
B0019.1	amx-2	0.19926
ZK1307.5	sqv-8	0.199258
T08E11.4	math-41	0.199229
Y54E2A.2		0.19897
C17G10.2		0.198968
F13G3.12		0.198727
C35B1.5		0.198668
Y55F3AM.11		0.19831
T04C10.4	atf-5	0.19778
M163.8		0.197723
B0041.4	rpl-4	0.197635
D2005.5	drh-3	0.197527
F22B5.9	frs-2	0.197508
F54C9.5	rpl-5	0.197216
F02A9.4		0.197147
Y38A8.1	ndx-3	0.197139
T04A8.10	sel-13	0.197111
F42G9.8		0.19699
Y54G2A.29		0.196849
F37C12.7		0.196773
T21B10.7		0.196385
Y44E3A.6		0.196309
F46G10.6	mxl-3	0.196309
F58D5.3		0.196156
ZK507.6		0.196133
Y65B4BR.3	ptr-21	0.195622
E04D5.5		0.195485
ZC247.2		0.195365
T09A12.2		0.194751
T10C6.6		0.194635
Y73C8C.2		0.19463
C11G6.1	taf-3	0.194529
Y43F8B.4		0.194529
Y48E1B.2		0.194406
Y32B12B.2		0.194199
ZK822.5		0.194128
B0564.10	unc-30	0.193985
F44B9.5		0.193907
F57B7.1		0.193635
Y47H9C.7		0.193599
CD4.4		0.193453
F25H2.12		0.193257
Y54G2A.6	clec-85	0.192848
F17C11.7		0.192842
F32H2.9	tba-6	0.192832
B0412.3		0.192661
C26C6.7		0.192297
C06A5.7	tmd-1	0.192294
W04C9.4		0.192268
H06I04.1		0.192262
B0393.2	rbg-3	0.192223
C05D11.6	nas-4	0.192204
F09E5.16		0.191875
R04B3.3		0.19169
T01B7.7	rol-6	0.191597
Y55F3BR.11		0.191168
R07C3.13		0.191033
ZC455.4	ugt-6	0.191033
K01G5.7	tbb-1	0.190943
F12F3.1	exp-2	0.190853
C48B6.2		0.190845
F53H1.1		0.190705
C48B6.6	smg-1	0.190601
Y38F1A.10	pak-8	0.190487
Y46G5A.4		0.190477
Y40C5A.4		0.190119
T04C9.4	mlp-1	0.190037
M195.1	col-77	0.190008
K08F8.6	let-19	0.189905
Y54F10AM.5		0.189815
C05C12.1		0.189627
R11A8.6	irs-1	0.1895
K11G12.5		0.189463
F43E2.1		0.189339
F52D2.7		0.189258
Y71D11A.3		0.189201
Y23H5A.7	crs-1	0.189142
Y39G10AR.18		0.189138
Y49F6C.2		0.188769
Y48G1C.7		0.188752
K02B2.5	rps-25	0.188515
F13B10.2	rpl-3	0.188484
C01G6.6	tag-165	0.188462
F58D5.4	ksr-2	0.188306
T09B4.8		0.18805
Y54G2A.31	ubc-13	0.18784
Y73B6BL.6	sqd-1	0.187785
C03H12.1		0.187769
K02F2.4	ulp-5	0.187756
F59G1.8		0.187753
K11C4.3	unc-70	0.187745
F53G12.13		0.187426
Y57G11A.1	tag-273	0.187319
F42A9.8		0.186807
F26G1.6		0.186612
R11G11.1	nhr-132	0.186497
Y51H7C.11		0.186018
C48E7.6		0.185743
Y23H5A.2		0.185733
F54E2.3	ketn-1	0.185724
Y43F8C.4		0.185684
R12B2.8		0.18547
Y75B8A.19		0.185468
F58F12.1		0.18539
Y111B2A.8		0.185226
R06C7.7	lin-61	0.185196
Y32F6A.5		0.185006
C27A7.1		0.184816
F25H5.1	tag-15	0.184704
F37C12.3		0.184609
C54F6.13	nhx-3	0.184588
C33A12.1		0.184556
K02B12.7		0.184486
Y43F4B.5		0.184378
T20F10.2		0.184317
F17A9.6	ceh-49	0.184264
F54C8.5		0.184261
F25G6.6	nrs-2	0.184252
F54B8.3	fbxa-69	0.184234
K02F6.9		0.184181
Y37E3.1		0.184165
T13H2.5		0.184105
F57B9.7		0.183812
F33D4.4		0.183743
F09G2.2		0.183484
F01F1.8	cct-6	0.183343
F42A10.1		0.183337
F42F12.3		0.183324
C54D1.6	bar-1	0.183244
Y95D11A.1		0.183038
F38E11.5		0.182837
M02D8.3		0.18277
C29H12.2		0.182517
C56C10.8	icd-1	0.182407
T09A12.5		0.182306
T28F12.2	unc-62	0.182305
ZK1098.10	unc-16	0.182242
K08A2.4		0.182161
F54D8.6		0.180787
Y67A10A.9		0.180786
F59G1.5	ptp-2	0.180339
C13B4.1		0.180155
T09E8.1		0.179983
B0379.1		0.179786
ZC64.3	ceh-18	0.179418
F14B8.6		0.179256
F42G2.6		0.179043
ZK6.11		0.178878
F11C1.2		0.17886
T01D3.1		0.178703
T10B11.3	ztf-4	0.178509
W03D8.11		0.178389
F45D3.5	sel-1	0.177481
K01G5.10		0.177331
C50F2.6	fkb-5	0.177302
T26H2.6	str-81	0.176961
F57B7.2		0.176897
K04D7.1	rack-1	0.176789
ZK455.2	gcy-9	0.17673
Y34B4A.6		0.176541
F20D12.5	exc-9	0.176399
C29H12.1	rrt-2	0.176386
Y66D12A.10		0.176237
Y55F3BR.2		0.176176
T05B4.1		0.175867
B0250.1	rpl-2	0.175772
C44H4.3	sym-1	0.175499
Y51H4A.3	rho-1	0.175431
Y62E10A.1	rpa-2	0.175401
Y23H5A.3		0.175336
F42H11.2	lem-3	0.17533
W06B4.3		0.175139
VT23B5.1		0.175135
Y39E4A.3		0.175077
ZC373.1		0.174953
F40F11.3		0.17474
F45D11.13	fbxb-30	0.174629
Y53H1B.1		0.174408
Y105C5B.21	jac-1	0.174213
T23B12.7	dnj-22	0.174161
Y39A3CL.1		0.174143
Y23B4A.2		0.174121
T10B11.2		0.174029
R07C3.11		0.173824
T02E1.8		0.173752
F43C1.4	nhr-20	0.173378
F08B4.1	dic-1	0.173224
ZK328.4		0.173108
F38H4.7	tag-30	0.173056
F54D8.3	alh-1	0.173007
Y71G12B.23		0.173001
Y79H2A.3		0.172813
K08B4.6	cpi-1	0.172622
T19E7.2	skn-1	0.172421
B0507.11	srx-115	0.172409
B0218.1		0.172393
K10C2.4		0.172241
Y113G7B.24		0.172238
Y71F9AL.16	arx-1	0.172225
CE7X_3.1		0.172102
Y41G9A.1	osm-5	0.17208
Y46G5A.17	cpt-1	0.17203
H04D03.1		0.171847
ZK1320.5		0.171782
Y38H6C.9		0.171216
K03E6.7		0.171139
Y57G11C.16	rps-18	0.171136
T05H4.10		0.171111
K11D12.12		0.171084
Y12A6A.2		0.171064
F40H3.2		0.170879
K12G11.4	sodh-2	0.170788
Y82E9BR.17		0.170759
T27F7.2	shc-2	0.170717
T24C4.6	zer-1	0.170699
K03H1.5		0.170674
B0218.2		0.170606
R119.5		0.170595
D2021.1		0.170506
Y45F10C.3		0.17039
C28H8.3		0.170269
C24H11.6		0.170186
F56F10.4		0.170141
F09E10.5		0.170111
T28H10.1		0.16993
K08E7.9	pgp-1	0.169744
C01G6.3		0.169711
Y56A3A.31		0.169704
T05G5.6	ech-6	0.169659
W08E12.7		0.169645
Y18D10A.1		0.169495
T12F5.3	glh-4	0.169412
M7.5	atgr-7	0.16933
Y102A5A.1	cand-1	0.169298
F15A4.12	tag-280	0.169231
Y45F10D.13	tag-208	0.169085
Y55F3AL.1	plx-1	0.168933
F21D12.3		0.168385
Y71A12B.17		0.168229
F58G1.7		0.168089
C09G5.8		0.167634
C49G7.8	cyp-35A4	0.167436
C49F8.1		0.167435
T06H11.1	unc-58	0.166714
R06B9.6	mig-14	0.166675
F56C11.5		0.166573
T28C6.8		0.16655
C37C3.9		0.166543
T02H6.6		0.166523
Y116A8C.12	arf-6	0.16649
C54F6.14	ftn-1	0.166479
F55B12.4		0.166441
Y63D3A.3	fbxb-101	0.166114
F32A7.3	tag-271	0.165971
C08A9.6		0.165675
Y38F1A.5	cyd-1	0.165366
F59E12.10	ddl-1	0.165281
Y45F10D.3	gly-10	0.165257
W07B8.3		0.165174
B0303.2		0.164977
T13G4.3		0.164952
T04A8.7		0.16488
Y71F9B.3		0.164847
F09F9.1		0.164826
Y46G5A.31	gsy-1	0.16469
F59G1.7	frh-1	0.164633
Y119D3B.11		0.164615
M142.5		0.164342
Y65B4A.6		0.164233
K08E4.6		0.1641
C05D11.13		0.163757
ZK1098.2		0.163691
T05B4.3	phat-4	0.163652
F32A7.8		0.163379
F49E10.5	ctbp-1	0.163185
ZK757.2		0.162921
R03G5.3		0.162611
Y76B12C.6		0.162452
Y95B8A.11		0.162201
F56A11.5		0.162023
ZK270.1	ptr-23	0.161889
F09F9.4		0.161778
F02E9.5		0.16151
C34G6.7	pqn-19	0.161507
Y47G6A.32		0.161385
T28C6.3		0.16112
R12H7.2	asp-4	0.160787
Y71A12B.1	rps-6	0.160554
F23B12.8	bmk-1	0.160272
C36B1.1	cle-1	0.160257
T21E3.3	lrp-2	0.160096
F47F2.1		0.159964
Y49E10.2	glrx-5	0.159791
F14D2.5		0.159685
F52E10.1	sdc-1	0.159658
F47D12.3		0.159601
T14G10.2	pxf-1	0.159519
K07C5.5		0.159455
W07E6.2		0.159276
C49A1.3		0.159248
C16A3.4		0.159081
ZC302.1	mre-11	0.158528
B0513.5		0.158504
R10F2.4		0.158481
K03E6.6	pfn-3	0.15838
Y48C3A.8		0.158328
M02B1.3		0.158071
F56D12.6		0.15807
ZC97.1	tag-354	0.15806
M106.3		0.157927
F54B3.3		0.15787
H27M09.4	dpy-14	0.157676
Y56A3A.32	wah-1	0.157672
H14E04.5	cic-1	0.157656
C06H2.1	atp-5	0.157621
T19D12.2		0.157494
Y110A7A.18	ppw-2	0.157375
K01A2.3		0.157362
Y57E12AL.2		0.157305
Y17G7A.1	hmg-12	0.157184
C27A2.1		0.157175
Y106G6D.1		0.156925
ZK546.15	try-1	0.156878
C37H5.6		0.156821
C24A11.8	frm-4	0.156679
F38E9.2	nas-39	0.156533
F30A10.8	stn-1	0.156367
ZK524.4		0.156312
JC8.10	unc-26	0.156205
H34I24.2		0.155847
F36F2.1		0.155285
C25G4.2		0.155275
T23G5.5	dat-1	0.155162
Y50D4C.3		0.155083
R144.7	larp-1	0.155054
C09G4.2		0.154982
R186.8		0.154913
F09G2.1		0.154393
ZK792.5		0.154198
Y48E1A.1		0.15404
F26H9.7	uev-3	0.153958
ZK353.6	lap-1	0.153755
C36B7.3		0.15358
C17D12.2	unc-75	0.153415
F40F11.4		0.153354
B0035.12		0.15334
C55B7.5	uri-1	0.15325
C50B8.3		0.153128
R119.4	pqn-59	0.153113
C30A5.4		0.152982
R06F6.9	ech-4	0.152979
Y71F9B.7	plk-2	0.152947
C16B8.1	lin-18	0.15279
F55H2.6	clu-1	0.152645
F13G3.7		0.152612
ZK418.4	lin-37	0.152432
T05A7.1		0.15236
F32D1.10	mcm-7	0.152117
Y67H2A.10		0.151752
ZK993.1	ceh-45	0.151674
Y45F3A.9		0.151655
T07C4.10		0.151625
W09C5.7		0.151623
F23C8.6		0.151594
F09E5.9		0.151459
K08E7.1		0.151414
ZK856.13	tag-315	0.151023
W03A5.7	dnj-24	0.150988
F09E10.7		0.150872
F18E2.2	tag-167	0.150707
F57C12.3	hlh-19	0.150661
F29C4.6		0.150514
T10B11.8		0.14979
C48B4.10		0.149788
T23G7.1	dpl-1	0.149615
T19B10.8		0.149599
EGAP2.1		0.149548
Y67D2.7		0.149466
C06A6.4		0.149331
F53E2.1	tag-304	0.149287
T24H7.5	tat-4	0.149255
W04G3.4	apt-9	0.149211
R08C7.9	fbxb-74	0.149198
ZK856.7		0.149178
H20J18.1	scd-1	0.149173
C25F6.8		0.149069
C01G12.6	nspb-10	0.149053
F36F2.8		0.149031
ZK829.4		0.149027
R06A10.2	gsa-1	0.148994
F46C5.7		0.148959
C35D10.8		0.14879
F25H2.10	rpa-0	0.148717
Y87G2A.9	ubc-14	0.148692
T20F10.1	tag-181	0.148529
B0035.15		0.148336
C32H11.4		0.14824
C32B5.10		0.148063
F44E2.4		0.147967
C01F6.5	aly-1	0.14779
ZK1127.6		0.147439
W01F3.3	mlt-11	0.14735
Y41D4B.5	rps-28	0.14718
AH9.3		0.146973
F23H11.5		0.146925
F08D12.2		0.146687
F48D6.4		0.14665
F57C2.1		0.146442
T28B8.1		0.14641
Y102A11A.2		0.146313
Y119D3B.12		0.146199
ZK265.6		0.146107
F08F1.3		0.145969
Y18H1A.6	pif-1	0.145851
Y71G12B.10		0.145683
ZK909.4	ces-2	0.145527
D2007.5		0.145503
M01D7.5	nlp-12	0.145427
F45C12.7		0.145403
C26E6.7		0.145346
C04A2.3	egl-27	0.145342
F01F1.7		0.145318
T11F9.4	aat-6	0.14522
ZK84.6	ins-6	0.145204
T23D8.7		0.144894
C26F1.9	rpl-39	0.144177
B0336.10	rpl-23	0.144149
C01G6.8	cam-1	0.14399
F31E3.3	rfc-4	0.143732
Y71G12A.3	tag-305	0.143409
Y71D11A.5		0.14261
Y38F2AR.12		0.142609
F49E8.6		0.142556
Y87G2A.13		0.142554
W01B11.5	pqn-72	0.142296
K11H12.2	rpl-15	0.142161
T01C3.1		0.141976
T23F6.5		0.141926
C06H2.3		0.14153
F59A6.1	nsy-1	0.141407
ZK792.6	let-60	0.141394
C35E7.2		0.141347
F13B12.6		0.141236
Y11D7A.12		0.141041
B0035.1		0.140801
F57B10.14		0.140791
F09B9.2	unc-115	0.140427
C04F12.4	rpl-14	0.140382
R186.1		0.140326
C33H5.11	imp-3	0.140102
ZK1010.4		0.140077
F12F6.7		0.140038
F10G7.1	tag-151	0.140004
F43D2.4	hot-1	0.139825
F59A3.2		0.139801
F10D2.2	ugt-39	0.139779
F09E5.1	pkc-3	0.139742
F01G4.6		0.139685
W01G7.4		0.139618
C01G12.7		0.139528
C52E12.4		0.139419
T04B8.5		0.13937
Y71F9AR.3		0.139343
C13F10.2		0.139285
T23G7.4	sec-5	0.139145
R166.3		0.138857
F43C9.4	mig-13	0.138825
C06G3.2	klp-18	0.138812
Y39A1A.6		0.138791
F11G11.7	dnj-9	0.138785
Y51H7C.7		0.138775
T07A9.11	rps-24	0.138702
Y55F3AM.15	csn-4	0.138638
T15B12.1		0.138576
C16B8.4		0.138576
Y37A1B.17		0.138545
R06A4.8		0.138534
K02B2.1		0.138519
C56C10.11		0.138489
Y113G7B.17		0.13837
E01G4.3		0.138348
F38B2.1	ifa-1	0.138148
Y75B7AR.1		0.137869
ZC395.2	clk-1	0.13781
F40G9.5		0.137808
T09F3.5		0.137525
F25H5.5		0.137323
C17E4.1		0.137251
C10A4.3		0.137152
W06B3.1		0.136999
F55F8.1	ptr-10	0.136973
F55F10.1		0.136887
F52B5.1	abts-1	0.136614
R05D3.4	rfp-1	0.136609
Y39E4B.6		0.136596
F55F8.3		0.136519
C10H11.9	let-502	0.1365
T24C12.4		0.136333
ZC8.6		0.136313
W04B5.4		0.136248
F53C11.3		0.136181
F55A11.3	hrd-1	0.136028
F26F4.11		0.135963
ZK945.4		0.13579
Y41G9A.3		0.135747
C03E10.3		0.135689
R13G10.1	dpy-27	0.135562
Y71F9B.2		0.135476
T20C4.1	srj-9	0.135386
C27H6.4		0.135147
C39B5.6		0.135145
F48C5.1		0.134747
F23B12.3		0.134703
Y56A3A.2		0.134664
B0001.3		0.134638
D2013.9		0.13463
R03D7.2		0.134566
ZK632.9		0.134551
F28B3.8	imb-1	0.134538
F45H11.5		0.134486
R74.3	xbp-1	0.134307
C54H2.5	sft-4	0.134283
C02B8.6		0.134256
C26E6.8	ula-1	0.134164
W04D2.1	atn-1	0.134147
C41H7.5		0.133758
K04G2.8	2008-04-01	0.133728
F11A10.6		0.133637
C01F6.1		0.133585
T07H8.4	mec-1	0.133416
T24H7.2		0.133368
F17C8.2	col-89	0.133296
C14B1.8		0.133257
T24H7.1	phb-2	0.133138
B0207.4	air-2	0.133135
Y82E9BR.1		0.133044
K06C4.17		0.132959
Y22D7AL.7		0.132924
Y45F10A.2	puf-3	0.132463
Y45G12B.3		0.132454
F16B4.8	cdc-25.2	0.132234
F56H11.4	elo-1	0.132188
T22B7.1	egl-13	0.132128
W08F4.8	cdc-37	0.132086
F29C4.2		0.132053
R107.5		0.131963
Y48C3A.12		0.131746
Y45F10D.9	sas-6	0.131711
D2062.12		0.131574
R148.3		0.13157
Y47D3A.22		0.131516
C29E4.3	ran-2	0.131375
W01A8.4		0.131359
M03D4.4		0.131267
W04A8.1		0.131228
ZC434.2	rps-7	0.131145
F31C3.3		0.131035
C52D10.9	skr-8	0.130938
F38B6.5	col-172	0.130715
Y50D4C.5		0.130691
F21C10.3		0.130656
C23F12.4		0.130614
ZK945.8		0.130586
F07A5.3		0.130328
Y69A2AR.1		0.130084
R07E5.14	rnp-4	0.13003
W08E3.1	snr-2	0.129871
W07E11.1		0.129747
C48B6.3		0.129396
W04C9.2		0.129287
C30B5.2		0.128919
Y37E3.8		0.128883
R01B10.5	jamp-1	0.128866
T09A5.6	mdt-10	0.128853
F32E10.5		0.12866
R06A4.6	sdz-26	0.128541
C18D11.2	maa-1	0.128487
C33G3.1	dyc-1	0.128437
R06C7.8	bub-1	0.128407
K08F9.4		0.128382
F09G8.5		0.128352
F56A6.2	hum-7	0.128331
Y65B4BL.2		0.127811
T05A12.3		0.127783
F02D8.2	grd-12	0.127717
Y71F9AL.18	pme-1	0.127715
T07G12.8		0.12761
T20B6.3		0.127604
T27D12.2	clh-1	0.127569
B0414.2	rnt-1	0.127552
Y39H10A.1		0.127352
T05B4.8		0.12732
JC8.7		0.127131
H28G03.6	mtm-5	0.127063
ZK177.6	fzy-1	0.127006
ZK678.1	lin-15A	0.12681
F15G9.5		0.126761
F21F8.3	asp-5	0.12673
T06E4.7		0.126561
C14H10.2		0.126535
C01H6.7	tag-298	0.126472
F15D4.3		0.126352
R04F11.2		0.126329
R05C11.3		0.126199
Y46G5A.2		0.126115
F54H12.2		0.126084
C16C10.8		0.12601
T01D3.5		0.125955
Y73B6BL.9	hil-2	0.125951
F55C9.10	fbxb-61	0.125914
Y41D4B.21	nhr-274	0.125776
F57C12.5	mrp-1	0.1257
T01C8.5		0.125658
F10B5.1	rpl-10	0.12552
B0334.3		0.125348
T16H12.3		0.1252
M7.2	klc-1	0.125165
F39H11.3	cdk-8	0.125131
C05D9.5	ife-4	0.124832
Y5F2A.4		0.124731
C26B2.3	nhr-31	0.124712
T03G6.2	nhr-40	0.124566
EEED8.1	mel-47	0.124494
C49A9.8	ugt-24	0.124451
ZC443.3		0.124327
R11A8.4	sir-2.1	0.124239
F25F8.1		0.124064
T08B2.2	col-56	0.123913
ZC410.7	lpl-1	0.123802
F54E7.7	rcn-1	0.123786
R05F9.1		0.123712
K05C4.5		0.123591
T06E4.1	hcp-2	0.123483
Y65B4A.9		0.12345
C27H5.7	dyf-13	0.123427
Y37H9A.3		0.123361
F08D12.6	fbxb-108	0.123315
Y71G12B.15	ubc-3	0.123279
C48D5.1	nhr-6	0.123183
F28C6.3	cpf-1	0.123107
T24B8.1	rpl-32	0.122908
B0303.3		0.122885
F39H11.2	tlf-1	0.122763
F20D1.8		0.12272
R03H10.6		0.122539
F42A6.9	elks-1	0.122511
T23F2.5		0.1225
F35H12.6		0.122491
W09C2.1	elt-1	0.122375
ZK770.3	inx-12	0.122363
E01F3.1	pde-3	0.122278
C56C10.10		0.122144
B0495.2		0.122088
C01A2.7	nlp-38	0.12193
B0280.4	odd-1	0.121851
F53F1.3		0.121833
F49B2.1	fbxb-8	0.121827
T22F3.3		0.121797
F44E2.3		0.121701
F11C1.1		0.12161
K10D2.5		0.121439
R160.1	dpy-23	0.121338
C33A11.1		0.121259
Y47D3A.15	aakb-2	0.121067
C05C10.6	ufd-3	0.120937
ZK632.6	cnx-1	0.120842
Y47G6A.8	crn-1	0.120842
C25A1.11	aha-1	0.120821
F21A3.7		0.120756
T02G5.13	mmaa-1	0.120737
K01G5.6	rib-2	0.120464
C53A5.1	ril-1	0.12043
F13G11.1	dmd-6	0.120344
F52C12.4		0.120312
Y40B1B.7		0.120237
C33H5.9	sec-10	0.12022
R05H5.4		0.120053
C52E4.4	rpt-1	0.120028
F48D6.3	hlh-13	0.11979
ZK1320.11		0.119763
C37A2.7		0.119682
F53B1.6		0.119436
B0478.3		0.11943
T12D8.1	tag-350	0.119322
F41H10.3		0.119296
Y77E11A.13	npp-20	0.119223
Y37D8A.14	cco-2	0.119038
Y39G8B.9		0.118959
F28F8.2	acs-2	0.118918
M03D4.1	zen-4	0.118671
F23H12.3		0.118499
C51E3.9		0.118497
T07H6.2	mom-1	0.118463
C02B8.3		0.118463
C30H6.7		0.118404
Y50E8A.16	haf-7	0.118381
Y43B11AR.4	rps-4	0.11837
C01F6.9		0.118353
K07F5.15		0.118311
Y17D7B.1	nhr-231	0.118269
C34E7.4		0.11824
C56A3.5		0.118226
T13F2.8	cav-1	0.118102
F44G4.2		0.117864
F45C12.13	fbxb-48	0.117838
ZK1067.4		0.117799
C01G10.11	unc-76	0.11778
F10G7.3	asf-1	0.11776
Y24F12A.1		0.117642
C52E4.5		0.117378
F58E10.7		0.117348
Y65B4BR.5		0.117334
B0432.4		0.117319
F28F8.3	lsm-5	0.117243
C10F3.6	fut-8	0.117238
Y105E8A.8		0.117072
Y75B8A.29		0.117037
F28H7.2		0.11703
C30H6.2	tag-141	0.116636
F53F10.4	unc-108	0.116496
C09D4.1		0.11649
Y71H2AM.23	tufm-1	0.116459
T20F5.7		0.116443
C14B1.1	pdi-1	0.116392
C46C11.4		0.116276
F46F6.4	dyf-6	0.11625
C33G8.4		0.11604
R02C2.2	kin-34	0.116037
T05G5.5		0.11602
R12H7.1	unc-9	0.116018
F45H10.1	alh-7	0.116
R06B9.4		0.115971
K02D10.1		0.115893
Y53C10A.5		0.115656
C14B9.7	rpl-21	0.115619
D1054.8		0.115523
F45D3.2		0.115424
C08F8.8	nhr-67	0.115358
T06E4.11	pqn-63	0.115296
W08F4.13		0.115231
H28G03.2		0.115199
ZK896.9		0.115132
Y73B6BL.36		0.115068
F49H12.6	acl-4	0.115036
C10C6.6		0.115023
C52D10.7	skr-9	0.114963
F28B3.1		0.114954
Y10G11A.1		0.114897
R05D11.3	ran-4	0.114765
ZK643.2		0.114763
T27F2.4		0.114637
C45G9.14		0.114576
T05C12.7	cct-1	0.114573
C44F1.3	lec-4	0.11457
Y41D4B.19	npp-8	0.114541
Y45G5AM.1	nhr-114	0.114488
R07D5.2		0.114437
R07C3.8		0.114407
Y105E8B.7		0.114161
W06H8.2		0.114137
D1022.1	ubc-6	0.114135
F13G3.4	dylt-1	0.114109
C43E11.11		0.113996
F41B5.3	cyp-33C5	0.113913
M01E5.6		0.113878
ZK829.7		0.113865
R05D7.5		0.113711
Y71A12B.11		0.113688
C46H11.11	fhod-1	0.113585
C27H6.8		0.113336
Y116A8C.9		0.11322
C37C3.2		0.112953
Y66C5A.1		0.112949
F45G2.2		0.112942
R53.4		0.112899
C10G8.5	ncx-2	0.112895
T08D10.2		0.112845
F10D11.2		0.112705
C14B4.2		0.112411
BE0003N10.1		0.112258
F10D2.10		0.112223
Y54G11A.10	lin-7	0.11217
Y37E3.3		0.11212
Y48B6A.8	ace-3	0.112115
F32A6.4	ags-3	0.111793
F26D12.1	fkh-7	0.111782
T13F2.3	pis-1	0.111702
H21P03.2		0.111624
F33D11.10		0.11162
H20J04.4		0.111359
M04G12.4		0.111357
Y45F10A.5	nlp-17	0.111235
Y71H2AM.10		0.111214
K08C7.2	fmo-1	0.111108
F09G2.9		0.110738
Y57A10A.18	pqn-87	0.110716
F01G10.6		0.110665
T08B2.10	rps-17	0.110497
F31D5.6		0.110459
ZK1010.1	ubq-2	0.110427
K08E3.5		0.110427
D2005.2	nlp-8	0.110312
F29C4.7		0.11024
F59E12.11		0.110225
Y48G1A.2		0.110024
ZC21.2	trp-1	0.109942
C26B2.7		0.109899
C44H4.5	tap-1	0.109711
C34E10.6	atp-2	0.109693
ZK377.2	sax-3	0.10952
Y53C12C.1		0.109448
B0379.4	tag-188	0.10939
K11C4.4	odc-1	0.109322
C10H11.6	ugt-26	0.10925
R13H4.8		0.109035
R11A8.7		0.108902
F36A2.6	rps-15	0.108855
T22E7.2		0.108726
C13G5.2		0.108719
R02E4.2		0.108711
F29B9.6	ubc-9	0.108606
F14D7.11		0.10849
T06F4.1		0.108375
Y65B4BR.8		0.108344
T22F7.1		0.108335
EGAP2.3	pho-1	0.108317
B0454.9		0.108297
C03D6.8	rpl-24.2	0.108275
C07D8.6		0.108171
C49C3.6		0.108158
H02I12.1		0.108147
Y106G6H.14		0.108135
F59H6.7	cya-2	0.10809
ZK652.4	rpl-35	0.107991
C56C10.13	dnj-8	0.107966
W02D3.9	unc-37	0.107955
Y62E10A.5	agt-1	0.107953
E02A10.4		0.107934
C24G6.4	nhr-47	0.107692
B0336.3		0.107687
F53C11.7	swan-2	0.107649
Y92H12BR.6		0.107455
F29C4.1	daf-1	0.107401
M195.2		0.107348
F38B7.3		0.107272
K04G11.4		0.107271
H25P06.1		0.107257
F26A1.1		0.107149
T01D3.3		0.10707
R102.6		0.107063
Y40B10A.8	nhr-86	0.107055
C56E6.5		0.107014
T07G12.1	cal-4	0.106655
Y110A7A.4		0.106651
M6.1	ifc-2	0.106645
C35E7.5		0.106588
F56D1.4	clr-1	0.106472
Y71G12B.24	mppa-1	0.106404
C35E7.10		0.106353
R13A5.3		0.106295
R02F11.3		0.106239
M18.2	dlc-2	0.106142
F16H6.3		0.106038
Y73B3A.18		0.106009
Y38E10A.7		0.105814
K09C8.1	pbo-4	0.105764
C30A5.3		0.105646
F35C11.4		0.105611
Y87G2A.14	ndx-8	0.105507
K02A11.3		0.105489
C13C4.2	nhr-154	0.105448
F38C2.2	hlh-17	0.105341
Y106G6H.3	rpl-30	0.105323
Y51H7C.5		0.105197
C33G3.4		0.105098
F53E10.6		0.105084
F01D5.5		0.105023
Y73B3A.1		0.105021
Y97E10C.1		0.104727
C28D4.2	cka-1	0.104726
T28A8.5		0.10465
Y49E10.14	pie-1	0.10455
F35G12.5		0.104418
C02B10.1		0.104293
Y39A1A.24		0.104221
T05A8.4		0.104213
F35G12.10	asb-1	0.104138
C06B3.7		0.104109
C34C6.7		0.104035
B0336.6		0.103964
ZK856.1	cul-5	0.103963
C16A3.3		0.10375
C34D4.14		0.103748
[truncated: 7,485 more rows]
