# Supplementary material for: Information Flow Analysis of Interactome Networks
Source: PLoS Comput Biol. 2009 Apr 10;5(4):e1000350. doi: 10.1371/journal.pcbi.1000350 (PMC2685719; doi:10.1371/journal.pcbi.1000350)
Supplement: Table S9 — A list of genes shown in Figure 7. This list includes 310 genes with enriched expression in muscle cells, 155 randomly selected genes, and 155 genes that are the least likely to be enriched in muscle as identified by the semi-supervised analysis. (0.04 MB XLS) [file pcbi.1000350.s012.xls]

## Sheet: heatmap_620genes.txt
Top 310 genes
K04H4.1
F40E10.3
Y9C2UA.1
F42E11.4
Y5F2A.1
D2092.4
F22A3.7
F02A9.2
T21B6.3
T03F7.1
F47A4.3
M01D1.1
T22D1.12
T28B4.3
F21H7.3
F09B9.4
C54E4.2
F46E10.10
C18A11.7
C34C12.5
F13H10.5
K12F2.1
F21D9.4
D2063.1
Y51A2D.14
Y71G12B.11
F36H1.4
ZK1248.16
ZC374.2
C44B12.2
T11B7.4
T03G11.9
T27A1.4
C54F6.5
T12A7.5
R01H10.3
T22E5.5
F08B6.4
F53A3.1
F53G2.4
K10C3.3
R05D7.1
B0228.4
T03E6.7
C37C3.6
ZK892.7
W08A12.2
Y105E8A.6
F10G2.1
K05F1.5
F54C1.7
C53D6.2
M03B6.5
R13A5.4
K02D7.2
C44B7.10
T10G3.1
E03G2.3
F57B7.4
T22A3.2
C36E6.5
C40H1.5
F55B12.5
C05D11.4
K01C8.10
D1007.14
K10B4.6
Y45F10B.13
T05G5.1
C29F5.1
F54F2.1
T05E7.4
B0024.3
W03G11.3
R173.1
F47B10.8
Y97E10AR.1
C32E12.4
R151.4
Y37D8A.2
F40F8.5
F30A10.1
F30H5.1
F56B6.4
ZK688.6
T07H6.1
M01E11.4
C28C12.7
Y75B8A.5
W06A7.2
C47E12.8
M03A8.4
Y39A3B.5
C05E4.9
T25F10.6
C18G1.1
Y105E8B.1
C49A1.10
F32A5.7
F53F10.1
T03G6.3
Y105E8A.26
F54D7.4
F11F1.6
Y73B6BL.21
F40A3.6
C01C7.1
F13H8.7
F13D12.4
F42A10.3
C03H5.5
F26A3.4
F22A3.2
Y69A2AR.31
F38B7.1
H22K11.2
F44B9.2
K02B7.3
B0403.6
C02F12.7
B0563.2
ZC123.4
C44B7.4
ZC477.9
F21C10.7
F52H2.7
Y23H5A.5
C05E4.3
K07A12.6
C39D10.3
Y5F2A.2
T20B3.2
C33B4.4
D1086.3
Y43F8B.1
Y58G8A.4
F10E7.4
M01E11.7
F09G2.5
Y55F3C.3
T04C12.4
E04F6.8
D1044.1
C35C5.5
T07C12.9
C49H3.8
ZK1058.1
F37H8.5
C28H8.6
B0495.10
ZC412.3
C14F5.3
F07A5.7
B0285.7
Y82E9BR.6
ZC410.4
R06A10.4
F22B7.5
T21B10.1
ZC8.3
T19D2.3
F21D5.8
F53H1.3
K08F8.1
Y105E8A.7
R31.2
C27B7.7
C15H9.9
Y71H2B.4
F40A3.4
C07E3.9
F52H3.7
Y50D7A.6
K07H8.12
JC8.8
F28H1.2
Y39A1A.20
ZK652.6
Y47D3B.5
D2030.5
F48F5.6
F27D9.8
T19H12.2
Y57A10A.10
F27D9.5
C46G7.2
C05C10.3
M79.3
R07G3.9
C50F2.4
C37F5.1
F54D7.2
K08C7.3
C18E9.1
K07E12.1
C46F4.2
W08E3.3
R11A5.7
Y39A1C.1
Y38F1A.9
C14B9.8
H22K11.4
Y42G9A.4
F54F3.1
ZK1058.2
F43G9.3
F09F7.2
K11C4.5
C45B2.2
K10B3.7
F29G9.2
ZK563.4
T03G11.1
D1009.3
Y73F8A.26
F41C3.5
Y52B11A.4
C07G2.3
ZK1321.2
K01A2.8
K06C4.9
F22E12.1
C48B6.9
Y71F9AR.2
Y37E3.11
R04D3.4
R11G1.6
C29F9.7
F40F4.4
Y46D2A.1
T23B12.11
Y56A3A.29
ZK1073.2
F42H10.3
Y62E10A.13
H35N03.1
T28B4.1
T01G1.3
F28B3.10
Y17D7B.4
R07G3.8
C52D10.6
C52B9.6
T04F8.2
K07D4.7
ZK643.1
R02F2.2
F59A2.3
Y105E8B.4
F35H12.5
F19C7.3
R06C1.1
ZK121.2
F15G9.4
F53A9.10
R11H6.5
Y57G11C.36
T19C3.4
C25A1.13
Y37E11B.5
Y71F9B.16
F08D12.7
F56D12.5
Y116F11B.12
R11A5.4
K08C7.7
F27C1.2
T14G12.4
F15D3.1
T04C12.5
T09B4.5
F57C9.4
K07E8.6
W04A8.4
B0496.3
K09C8.5
T02G5.9
Y73B6BL.3
ZK593.1
W06F12.1
C08D8.2
T22A3.4
T22B2.4
T06A10.4
F32A6.5
T02D1.8
R07H5.2
K10D3.2
F17H10.3
R10E4.2
W02C12.3
F15D3.7
C07F11.1
R09G11.1
T07E3.4
ZK669.1
H18N23.2
C03G5.1
F10G7.9
F31D5.3
F21H7.5
F54F7.1
C26E6.3
T23F1.7
F11G11.1
T24B8.4
W04E12.8
R07E3.5
C46C2.7
W09G3.6
Random 155 genes
M05D6.5
C18D1.4
T23H2.3
Y80D3A.2
BE0003N10.2
W08A12.3
F08F8.10
B0261.8
C46C11.2
T23B12.7
F09E10.5
M02B1.3
Y71G12B.10
C16B8.4
ZK632.9
R13A5.3
T01B10.4
F42E11.1
C05B5.7
Y105E8A.11
R06A4.2
F56H9.3
C14A4.2
C27A12.6
T08E11.6
F55D10.2
ZC443.6
C54C8.4
T09A5.1
ZK550.3
F45E4.1
C01C10.2
K10B3.6
T07C4.2
Y48G8AL.11
F17C11.10
T23B3.1
F54C9.1
K01A2.5
C18H2.2
C14C10.4
C33C12.9
F23B2.4
K04G7.1
F43G9.9
M03C11.3
ZC395.3
F53H4.4
T23D8.8
Y48G1C.11
F10E9.3
F17C11.2
C06G3.6
F59E12.13
T20D3.6
C24B5.1
Y80D3A.1
F27D4.6
Y108G3AL.2
C07E3.2
F08F3.3
F02E9.2
B0334.1
T07A9.8
T27F6.8
EGAP9.2
F26E4.11
T04F8.7
W09C2.3
ZK945.2
F54E7.1
F52C9.8
C15F1.7
F36F2.4
F38B7.2
K01C8.3
F45E12.2
F37C4.6
R13A1.4
K10B2.1
C25H3.4
K12H4.1
F35G12.6
R03E9.3
C47E12.5
T05B4.2
B0495.4
ZC410.2
K02A4.2
R11A8.3
M02H5.3
F41G4.3
C53B7.4
R06B10.5
Y34B4A.7
F41H10.10
Y39G10AR.12
C24A3.6
F18G5.6
C55A6.1
F40G9.4
M7.8
F08C6.7
ZK822.1
K01G5.1
T10C6.5
2RSSE.1
D2007.1
B0303.15
Y45G5AM.2
C13B4.2
Y113G7B.18
Y113G7A.4
C02D5.2
T27A3.1
K06A4.3
H32K16.1
C04F5.8
Y71F9B.5
C44B9.4
T12A2.16
H37N21.1
F56B3.2
Y87G2A.1
C49H3.10
F56F3.5
Y69A2AR.2
M02E1.1
M01G5.3
Y43F8C.3
R90.1
F15A2.3
C52B9.3
F52H3.1
R144.12
Y66A7A.1
C08F1.11
F46C8.2
F59E10.2
Y23H5A.1
F14H3.6
R05D8.11
B0513.3
Y51A2D.4
B0393.1
C49F5.3
F22G12.6
T16G12.4
C17B7.2
F52G3.1
Y48G8AL.14
T27E4.9
B0019.1
F54C9.5
T04A8.10
Bottom scoring 155 genes
C01G8.2
Y48G1C.12
F08B4.6
Y53F4B.14
Y59A8B.10
T26A8.1
W01A11.1
Y55H10A.1
Y39G10AR.20
Y47G6A.6
T20F5.2
T03D8.1
ZK622.3
F42A8.3
C56G2.15
T13H5.6
C26H9A.1
K10D2.6
C15H11.3
F09D1.1
K02D10.5
T22D1.4
ZK742.4
T22D1.10
C07A9.3
T26C5.1
F44C8.8
C32D5.3
Y54E10BL.6
C27F2.4
F53A2.3
C02F5.13
T10C6.14
T23C6.1
Y49E10.1
Y41C4A.8
T20D3.8
R12C12.8
D2045.1
K06H7.9
C25A1.3
Y38C1AA.1
Y63D3A.11
C14C11.3
C32D5.7
F21D5.4
B0464.6
C50E3.5
C27A12.5
Y54E5B.3
K03B4.1
C27H2.2
F28B12.2
F54D5.14
T22B11.3
ZK593.4
T20H4.4
B0285.4
T07F10.1
T23E1.2
Y37E11AM.2
Y73B3A.20
B0491.7
C54G4.7
ZK686.3
F52H2.5
F35B12.5
Y45F3A.1
Y9D1A.1
Y53C12A.3
C05C9.1
F52F12.3
C27B7.4
C53B4.3
Y110A7A.17
ZK370.7
T26E3.3
W03F8.5
T04F8.1
Y39B6A.5
Y39A1A.8
F58A6.1
C39B10.6
C13C4.5
C05G6.1
T06E8.1
F07C6.4
T07C4.3
C25A11.4
T09A5.2
C25F6.2
T28F3.8
W06E11.1
B0513.1
M70.4
F53C11.8
H19N07.1
F44C8.10
K02F6.1
T07C4.11
M110.5
ZK697.2
Y53F4B.39
C06A8.4
M01E11.2
F29C12.3
T01H8.5
C41G7.7
M04C7.1
W03F8.10
ZC101.2
T06C12.10
VF11C1L.1
K06A5.8
C09F5.2
Y40G12A.1
C17E4.11
F28B3.9
K08F8.3
Y51F10.4
C34B2.10
R03D7.1
C18C4.5
M01A12.1
T19C3.8
R01H10.8
C46H3.2
R11D1.11
R10E11.6
F22B5.1
T24A6.20
F55A12.7
R10H10.7
ZK512.5
T24D1.2
C07H4.2
C25F6.1
LLC1.1
F32B4.4
Y59E9AL.4
F49E8.7
D1007.16
D2063.3
B0025.2
T20F10.5
F54E7.5
F40G9.6
C01G5.8
F57C2.6
Y18D10A.17
Y18H1A.11
F21D5.1
F59A3.3
Y46G5A.13
C02F5.9
